# Supplementary material for: Subdigital integumentary microstructure in Cyrtodactylus (Squamata: Gekkota): do those lineages with incipiently expressed toepads exclusively exhibit adhesive setae?
Source: publisher site journal article supplement (doi:10.3762/bjnano.17.4), 2026-01-06
Supplement: Additional file 3 [file 2190-4286-17-4-S3.pdf]

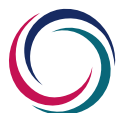

## Supporting Information

for

### **Subdigital integumentary microstructure in *Cyrtodactylus* (Squamata: Gekkota): do those lineages with incipiently expressed toepads exclusively exhibit adhesive setae?**

Philipp Ginal, Yannick Ecker, Timothy Higham, L. Lee Grismer, Benjamin Wipfler, Dennis Rödder, Anthony Russell and Jendrian Riedel

*Beilstein J. Nanotechnol.* **2026**, *17*, 38–56. doi:10.3762/bjnano.17.4

### **Additional micrographs of subdigital microstructure in *Cyrtodactylus***

This document gives a visual overview over the microstructures examined in the main paper by presenting SEM images for the majority of species sampled. For details on SEM parameters see the main manuscript. For details on collection abbreviations see Supporting Information File 1.

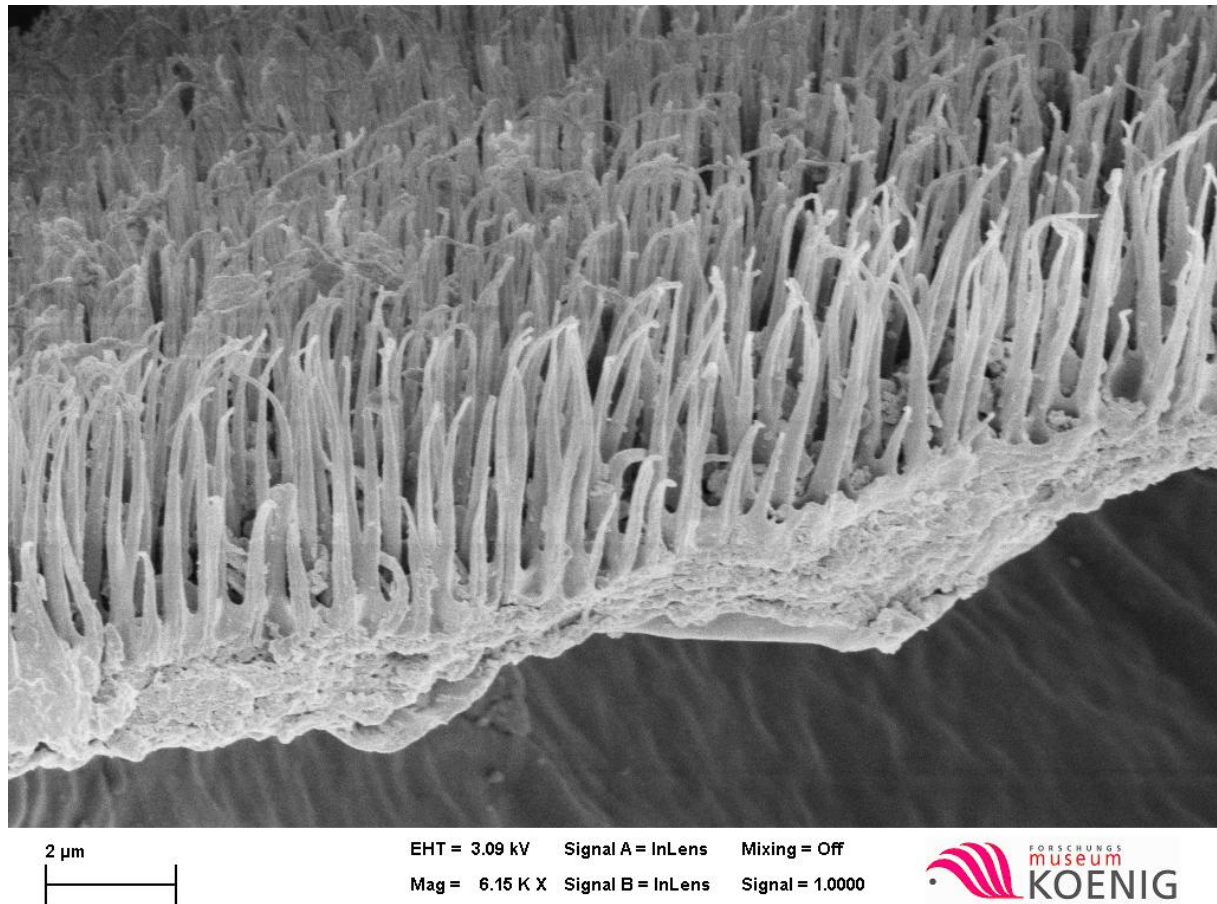

**Figure S1:** Cross-section of the prongs of *Cyrtodactylus annulatus* (Specimen: ZFMK 52339).

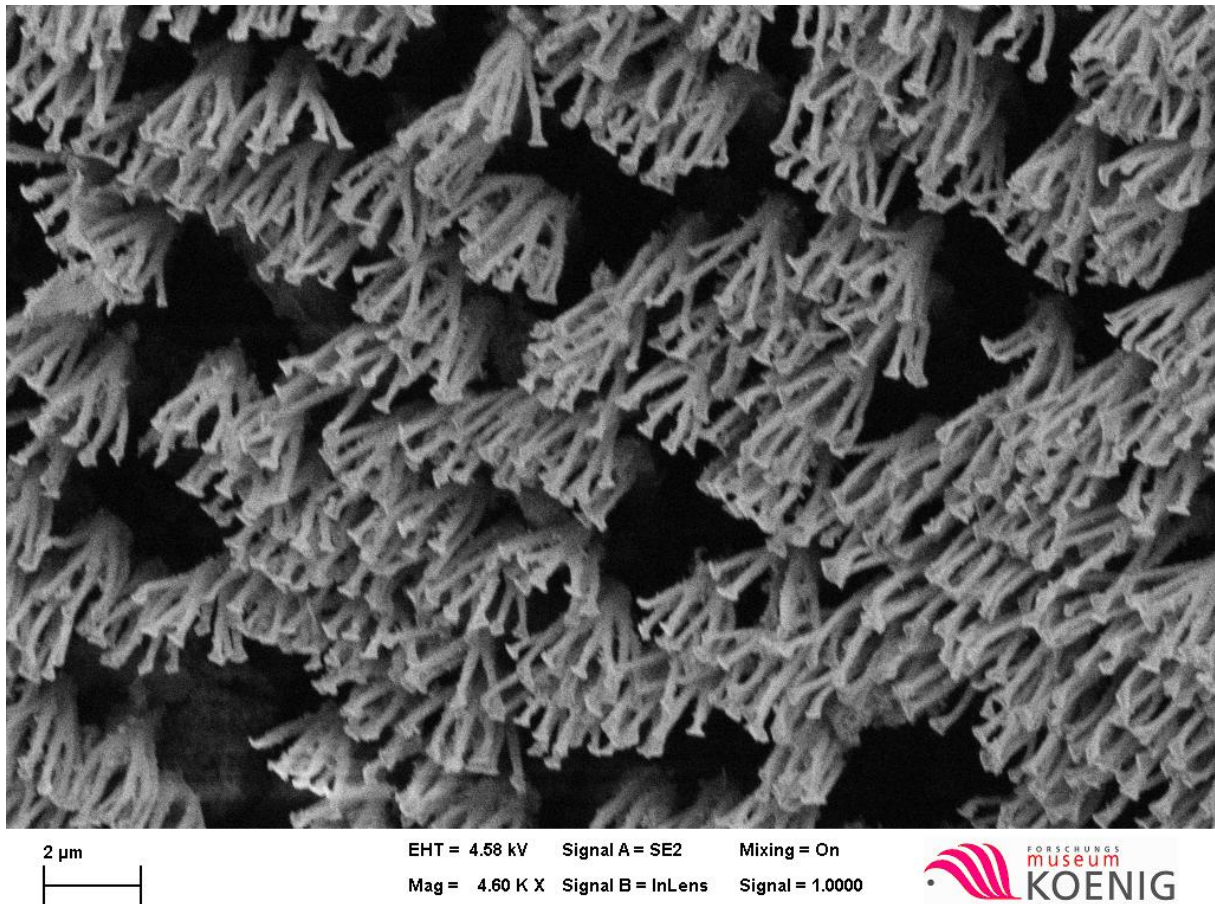

**Figure S2:** Top-down view on the setae of *C. bintangtinggi* (Specimen: LSUHC 10787).



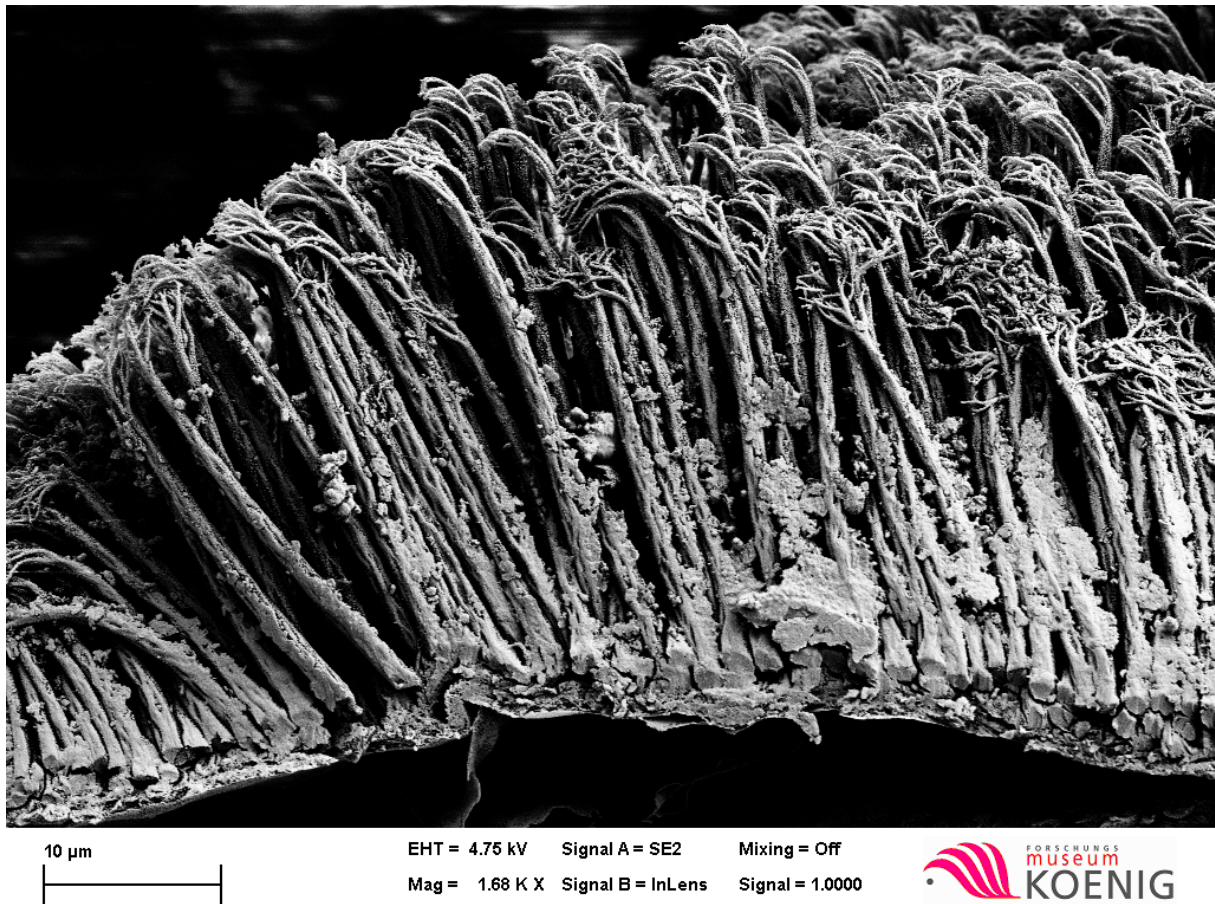

**Figure S3:** Cross-section of the setae of *Cyrtodactylus brevipalmatus* (Specimen: ZFMK 46814).

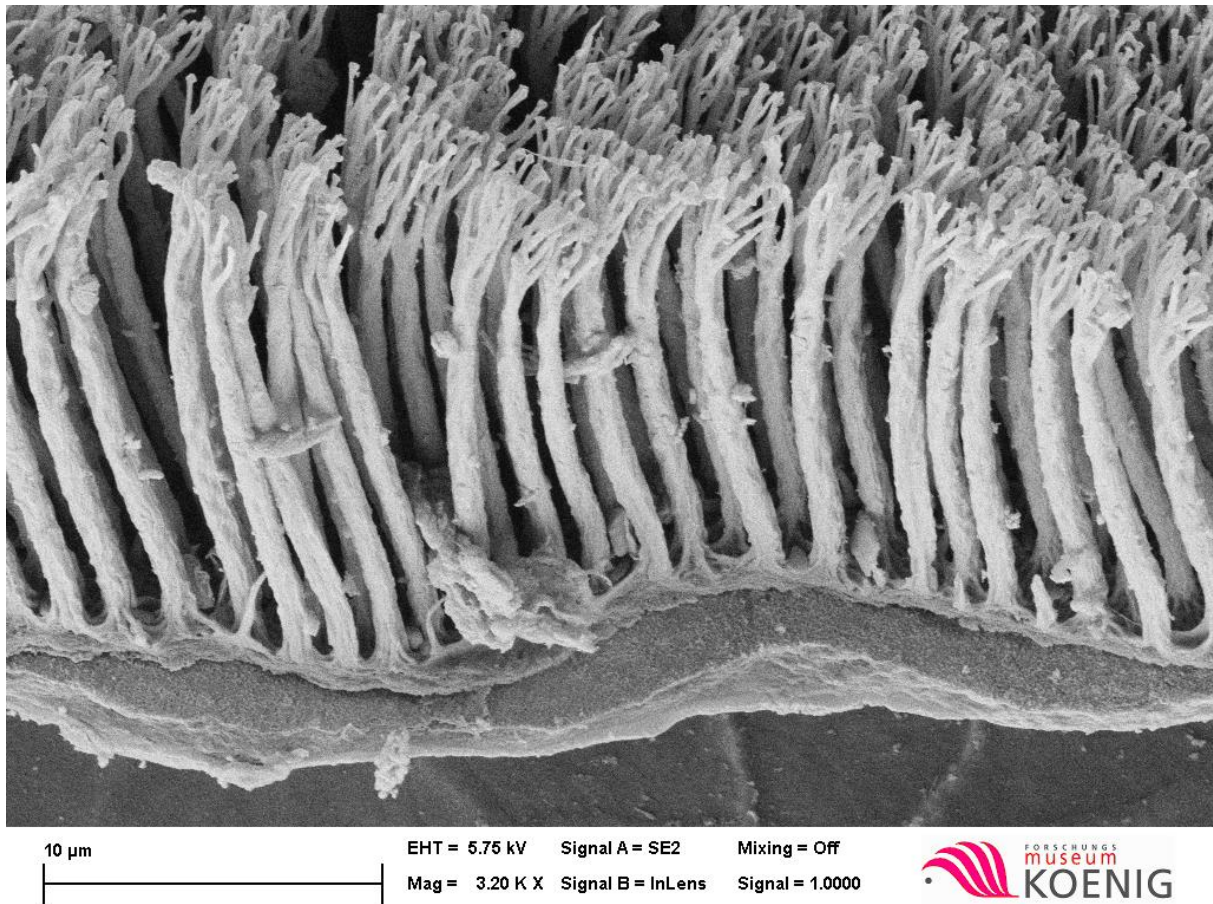

**Figure S4:** Cross-section of the setae of *Cyrtodactylus hontreensis* (Specimen: LSUHC 10415).

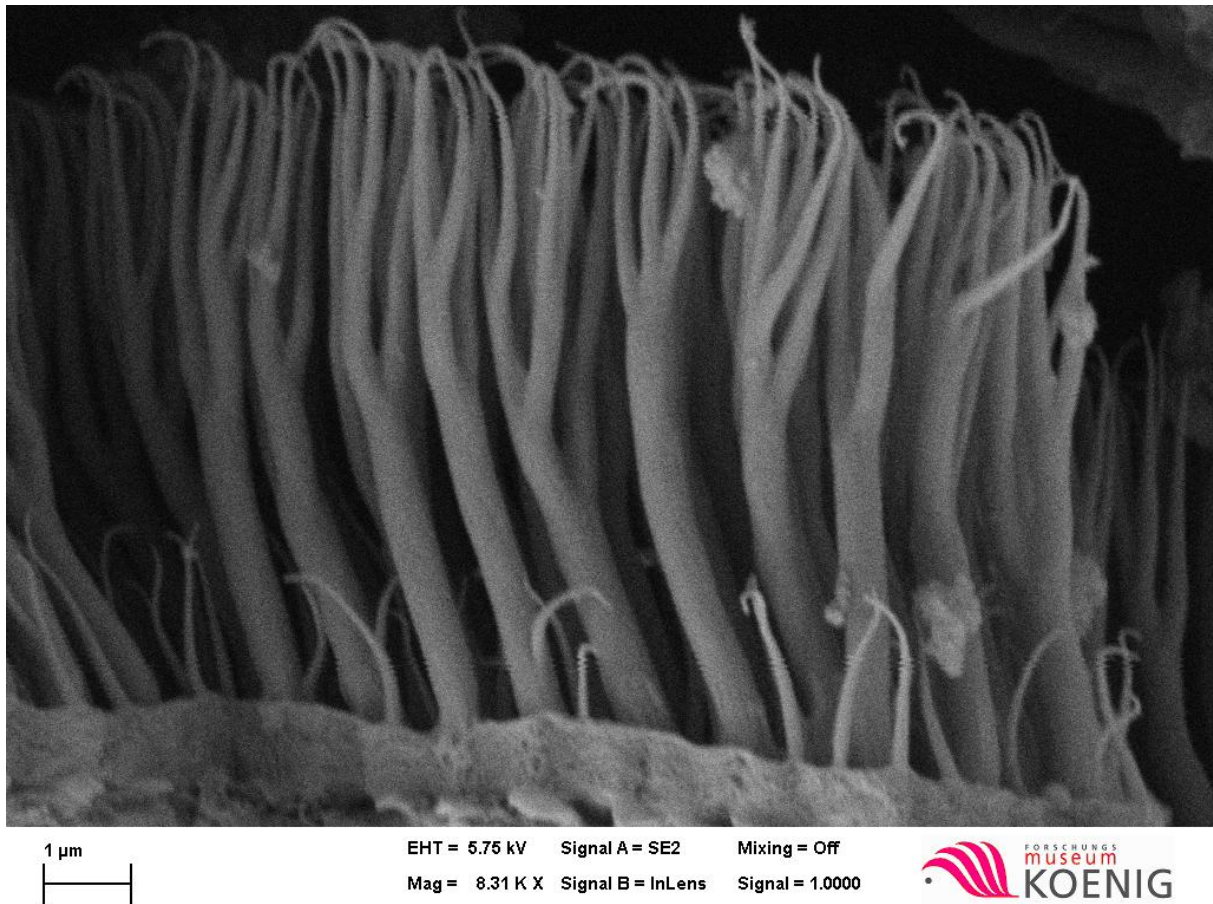

**Figure S5:** Cross-section of the spines of *Cyrtodactylus huynhi* (Specimen: LSUHC 10471).



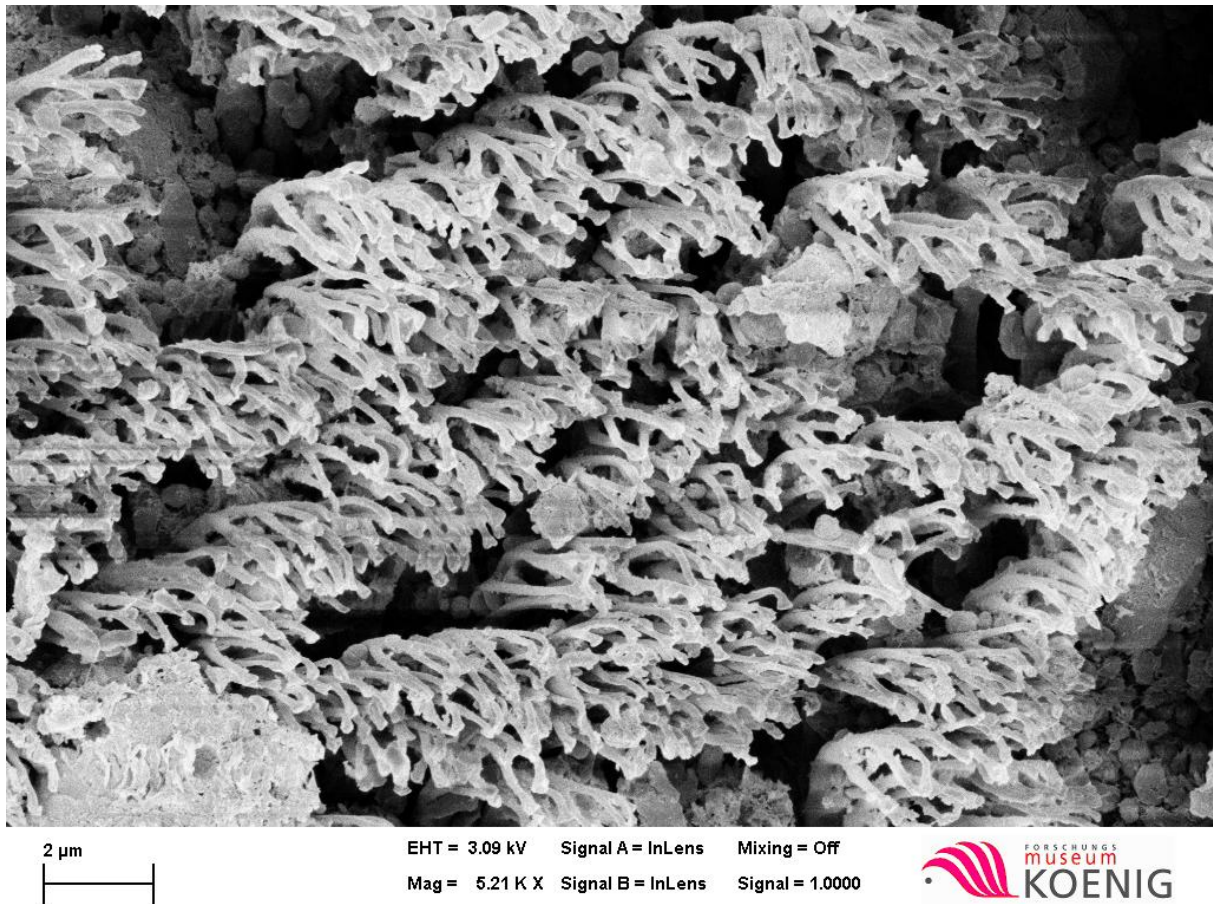

**Figure S6:** Top-down view on the setae of *Cyrtodactylus lekaguli* (Specimen: ZFMK 045834).

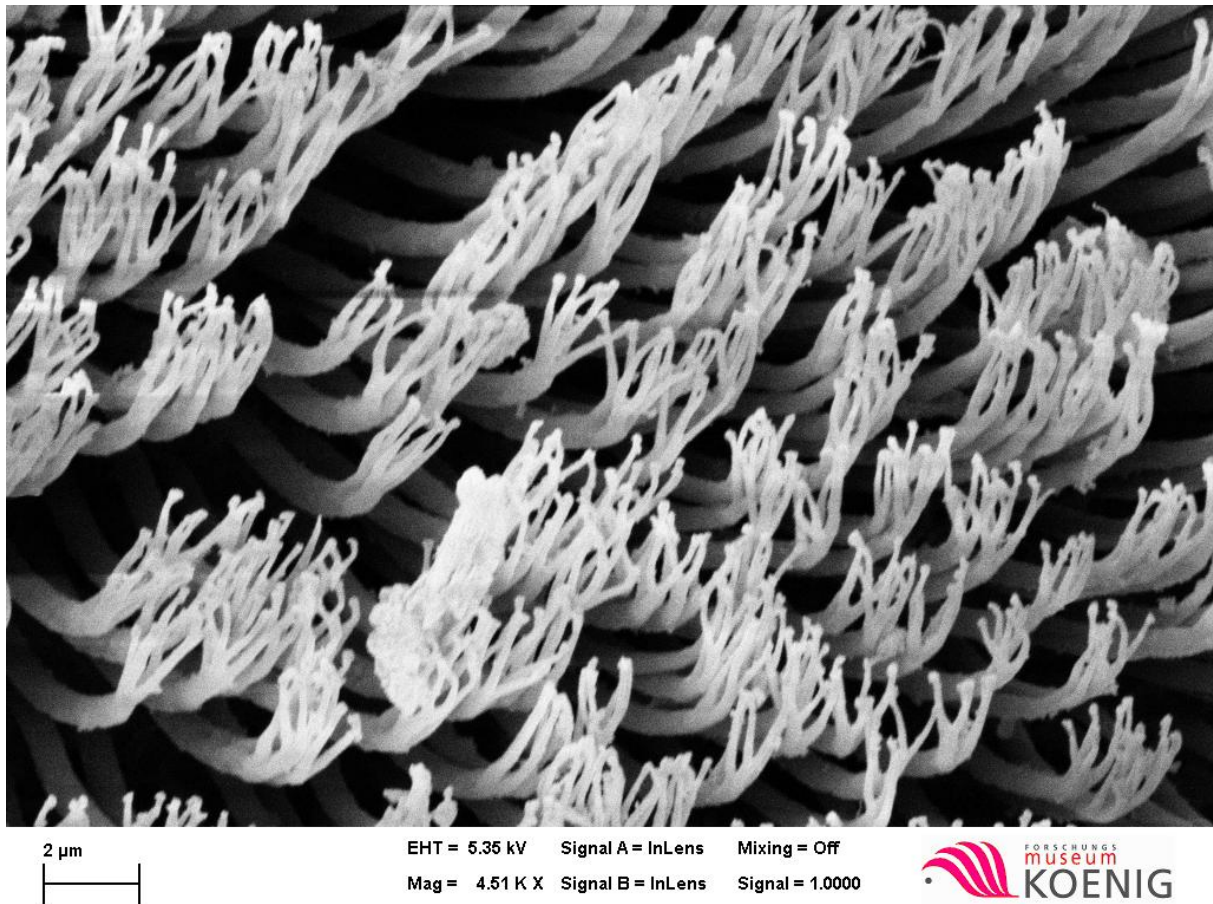

**Figure S7:** Top-down view on the setae of *Cyrtodactylus linnwayensis* (Specimen: LSUHC 13914).



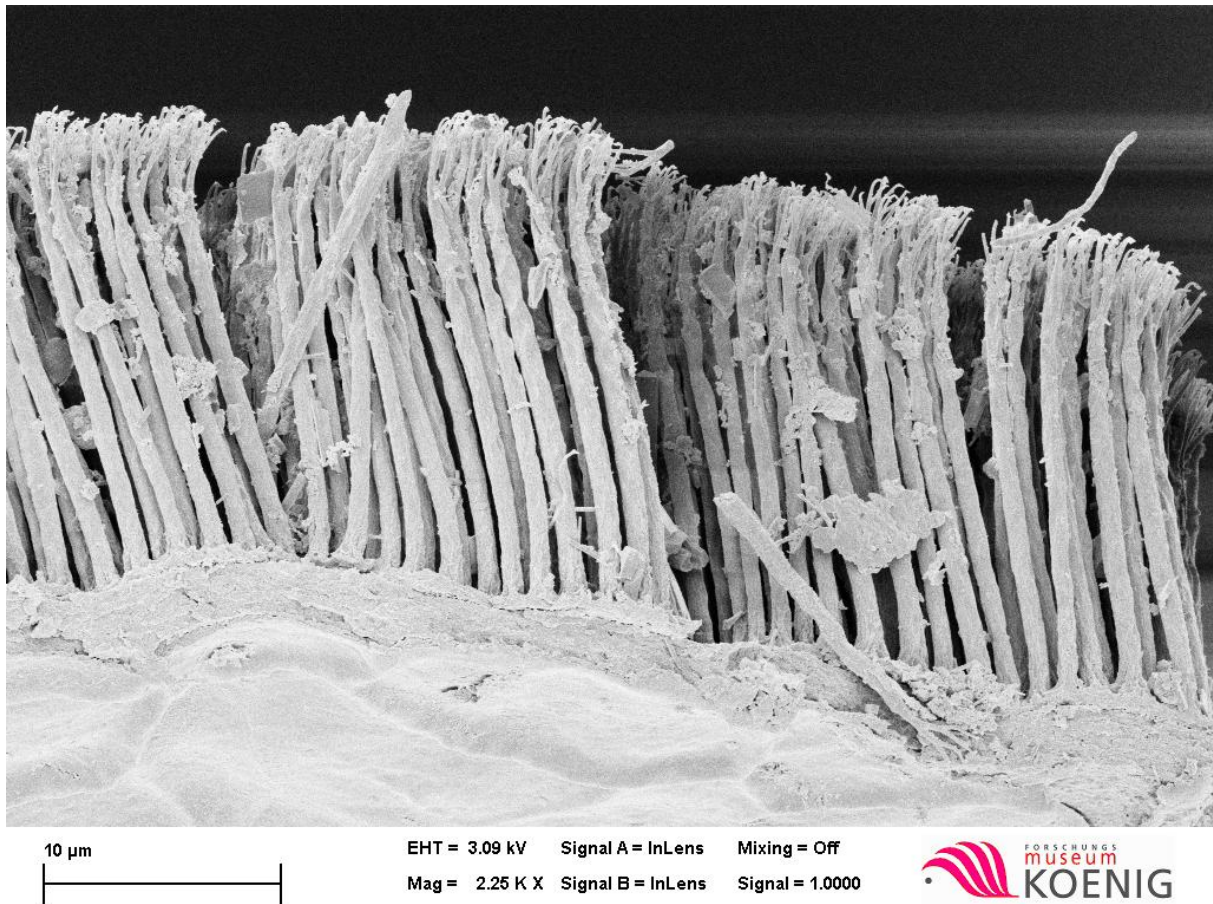

**Figure S8:** Cross-section of the setae of *Cyrtodactylus louisianensis* (Specimen: ZMA 15375b).

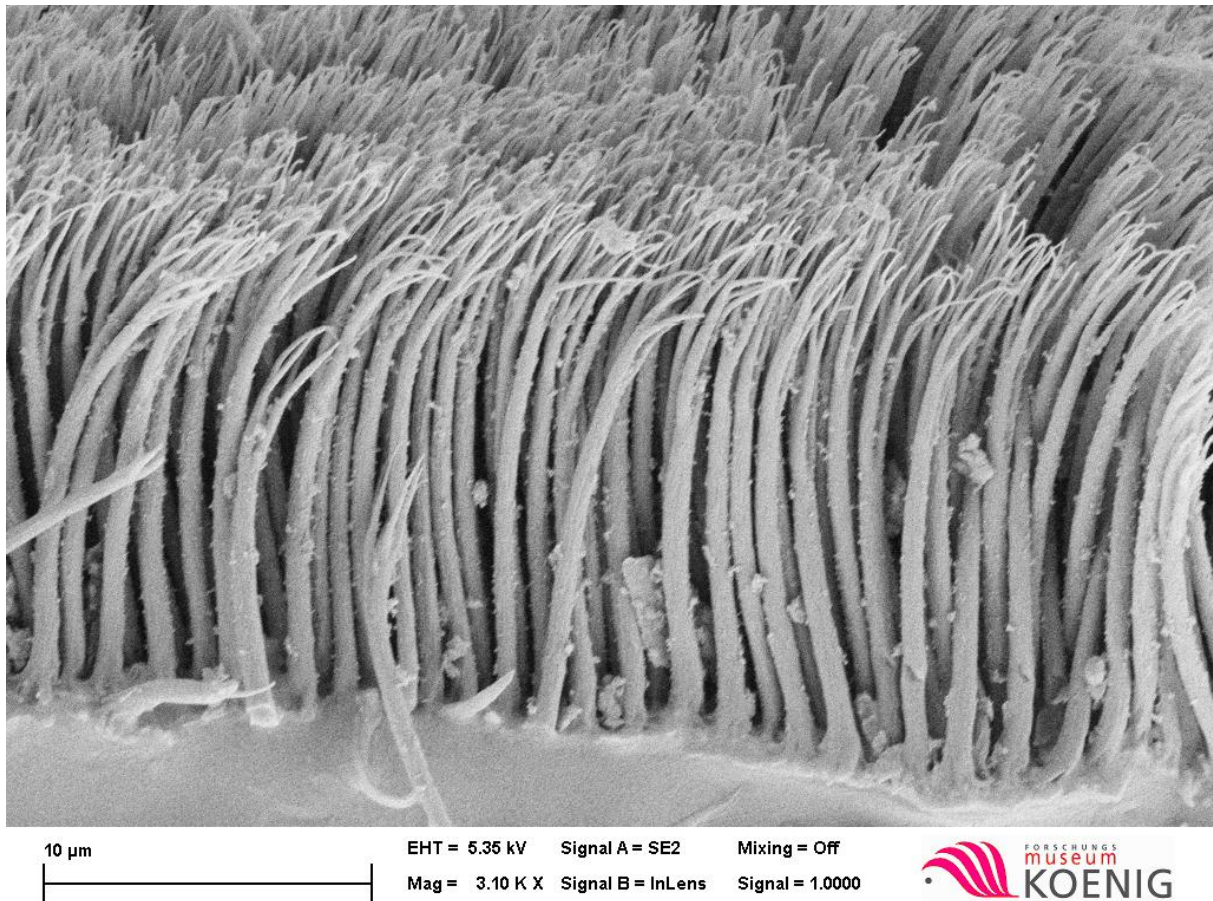

**Figure S9:** Cross-section of the prongs of *Cyrtodactylus pharbaungensis* (Specimen: LSUHC 13348).

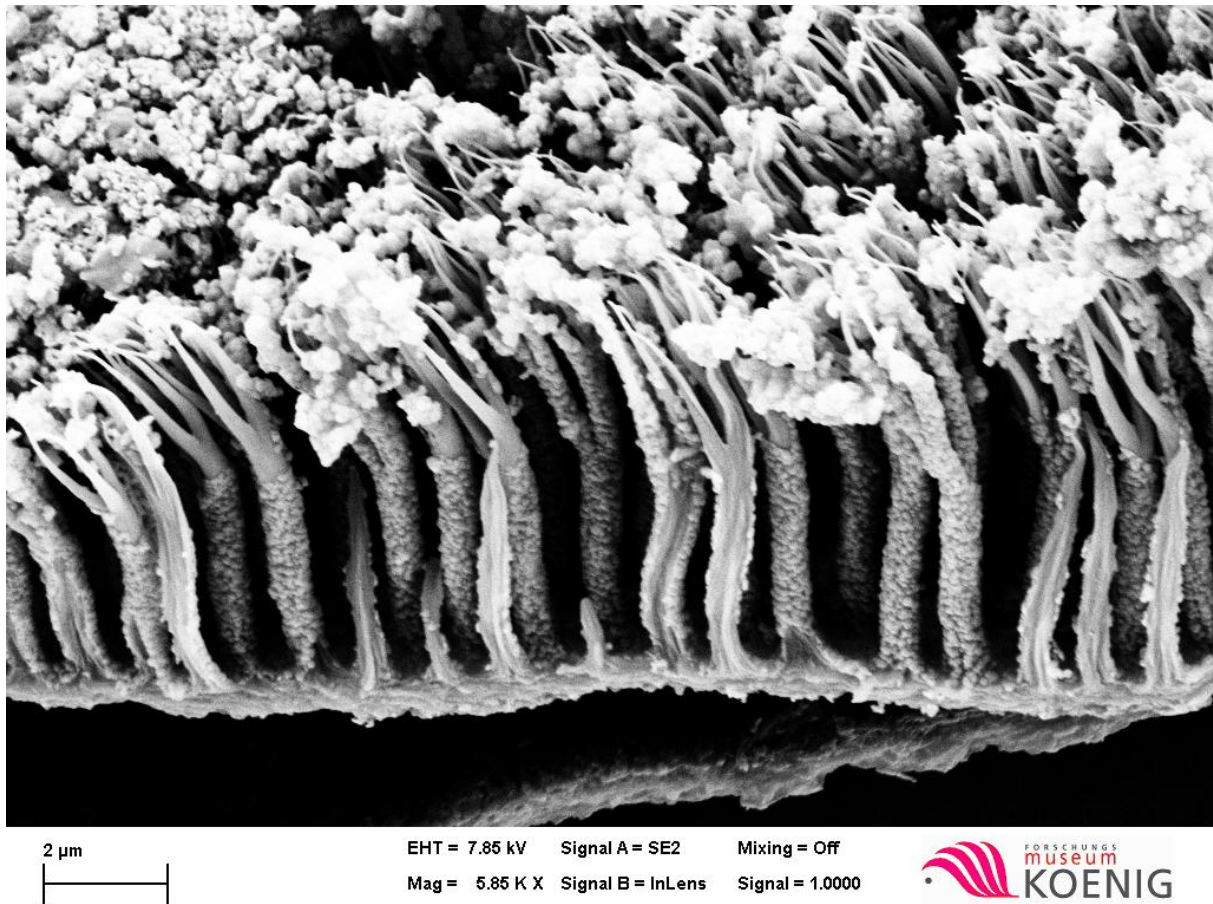

**Figure S10:** Cross-section of the spines of *Cyrtodactylus phongnhakebangensis* (Specimen: ZFMK 80650).



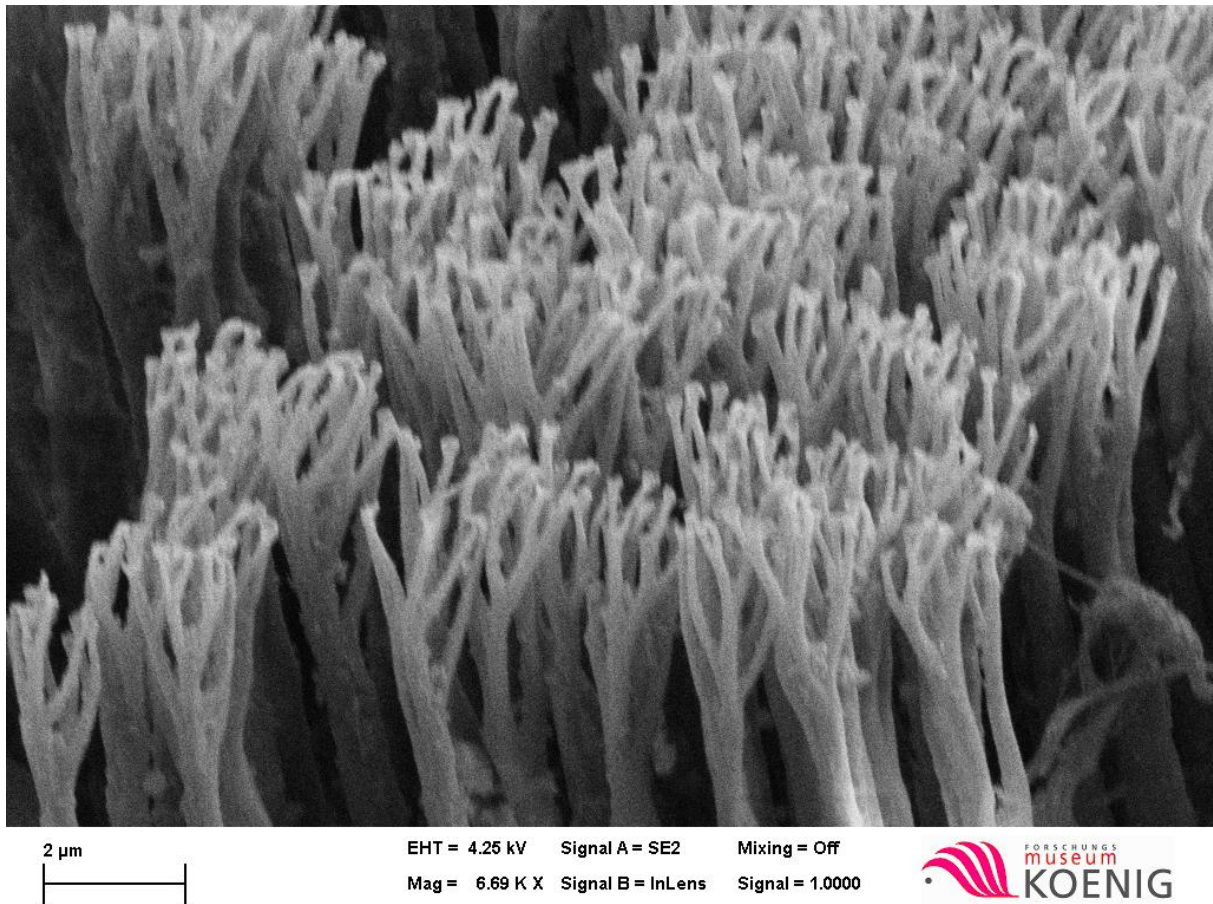

**Figure S11:** Top-down view on the setae of *Cyrtodactylus thylacodactylus* (Specimen: LSUHC 09336).
